# Supplementary material for: A reinvestigation of the boron cluster B15+/0/−: a benchmark of density functionals and consideration of aromaticity models
Source: Royal Society of Chemistry journal article supplement (doi:10.1039/d4cp00077c), 2024-01-01
Supplement: d4cp00077c1.pdf [file d4cp00077c1.pdf]

## Supplementary Information (SI)

### **A reinvestigation of the boron cluster $B_{15}^{+0/-}$ : A benchmark of density functionals and consideration of aromaticity models**

**Yassin A. Jeilani,<sup>1</sup> Long Van Duong,<sup>2,4,\*</sup> Obaid Moraya Saeed Al Qahtani,<sup>1</sup>  
Minh Tho Nguyen<sup>3,4</sup>**

<sup>1</sup> Department of Chemistry, University of Hail, Hail, Saudi Arabia

<sup>2</sup> Atomic Molecular and Optical Physics Research Group, Science and Technology Advanced Institute,  
Van Lang University, Ho Chi Minh City, Vietnam

<sup>3</sup> Laboratory of Chemical Computation and Modeling, Institute for Computational Science and Artificial  
Intelligence, Van Lang University, Ho Chi Minh City, Vietnam

<sup>4</sup> Faculty of Applied Technology, School of Technology, Van Lang University, Ho Chi Minh City, Vietnam

\* Corresponding author: [duongvanlong@vlu.edu.vn](mailto:duongvanlong@vlu.edu.vn)

## Tables of supplementary information (SI)

**Table S1.** The T1 diagnostic of CCSD(T)/aug-cc-pVTZ single point of B<sub>15</sub><sup>+0/-</sup>.

| Isomer    | T1    | Isomer    | T1    | Isomer    | T1    | Isomer    | T1    |
|-----------|-------|-----------|-------|-----------|-------|-----------|-------|
| <b>1a</b> | 0.036 | <b>2a</b> | 0.023 | <b>3a</b> | 0.018 | <b>4a</b> | 0.023 |
| <b>5a</b> | 0.020 | <b>6a</b> | 0.023 | <b>7a</b> | 0.032 | <b>8a</b> | 0.024 |
| <b>1n</b> | 0.045 | <b>2n</b> | 0.029 | <b>3n</b> | 0.031 | <b>4n</b> | 0.021 |
| <b>1c</b> | 0.020 | <b>2c</b> | 0.022 | <b>3c</b> | 0.021 | <b>4c</b> | 0.020 |

**Table S2.** Relative energies (kcal/mol) of  $\Delta E_{3a-2a}$ ,  $\Delta E_{7a-2a}$  and  $\Delta E_{4a-2a}$  and their errors  $\Delta\Delta E_{3a-2a}$ ,  $\Delta\Delta E_{7a-2a}$  and  $\Delta\Delta E_{4a-2a}$  of B<sub>15</sub><sup>-</sup>. The MAE is in the last column.

|                       | $\Delta E_{3a-2a}$ | $\Delta E_{7a-2a}$ | $\Delta E_{4a-2a}$ | $\Delta\Delta E_{3a-2a}$ | $\Delta\Delta E_{7a-2a}$ | $\Delta\Delta E_{4a-2a}$ | MAE  |
|-----------------------|--------------------|--------------------|--------------------|--------------------------|--------------------------|--------------------------|------|
| CCSD(T) <sup>c</sup>  | 2.4                | 6.3                | 5.5                | -                        | -                        | -                        | -    |
| B3LYP <sup>a</sup>    | -1.19              | 0.83               | 12.95              | -3.59                    | -5.47                    | 7.45                     | 5.50 |
| B3LYP <sup>b</sup>    | -1.71              | 0.30               | 12.10              | -4.11                    | -6.00                    | 6.60                     | 5.57 |
| M06 <sup>a</sup>      | 5.78               | 5.56               | 11.57              | 3.38                     | -0.74                    | 6.07                     | 3.40 |
| M06 <sup>b</sup>      | 5.34               | 5.56               | 10.47              | 2.94                     | -0.74                    | 4.97                     | 2.88 |
| VSXC <sup>a</sup>     | 1.16               | 1.65               | 10.56              | -1.24                    | -4.65                    | 5.06                     | 3.65 |
| VSXC <sup>b</sup>     | 0.51               | 1.21               | 9.72               | -1.89                    | -5.09                    | 4.22                     | 3.73 |
| B1B95 <sup>a</sup>    | 4.04               | 6.10               | 3.87               | 1.64                     | -0.20                    | -1.63                    | 1.16 |
| B1B95 <sup>b</sup>    | 3.69               | 5.71               | 3.19               | 1.29                     | -0.59                    | -2.31                    | 1.40 |
| BPBE <sup>a</sup>     | 0.55               | 1.41               | 9.30               | -1.85                    | -4.89                    | 3.80                     | 3.51 |
| BPBE <sup>b</sup>     | 0.15               | 1.02               | 8.46               | -2.25                    | -5.28                    | 2.96                     | 3.50 |
| TPSSh <sup>a</sup>    | 0.25               | 1.44               | 5.16               | -2.15                    | -4.86                    | -0.34                    | 2.45 |
| TPSSh <sup>b</sup>    | -0.29              | 1.02               | 4.36               | -2.69                    | -5.28                    | -1.14                    | 3.04 |
| PBE <sup>a</sup>      | 1.50               | 2.26               | 9.04               | -0.90                    | -4.04                    | 3.54                     | 2.83 |
| PBE <sup>b</sup>      | 1.02               | 1.83               | 8.24               | -1.38                    | -4.47                    | 2.74                     | 2.86 |
| PBE0 <sup>a</sup>     | 4.02               | 2.61               | 7.83               | 1.62                     | -3.69                    | 2.33                     | 2.55 |
| PBE0 <sup>b</sup>     | 3.55               | 2.22               | 7.00               | 1.15                     | -4.08                    | 1.50                     | 2.24 |
| HSE06 <sup>a</sup>    | 3.40               | 2.18               | 8.41               | 1.00                     | -4.12                    | 2.91                     | 2.68 |
| HSE06 <sup>b</sup>    | 2.96               | 1.81               | 7.55               | 0.56                     | -4.49                    | 2.05                     | 2.37 |
| B2PLYPD3 <sup>a</sup> | 2.44               | 4.59               | 2.44               | 0.04                     | -1.71                    | -3.06                    | 1.60 |
| B2PLYPD3 <sup>b</sup> | 3.07               | 4.52               | 2.52               | 0.67                     | -1.78                    | -2.98                    | 1.81 |

<sup>a)</sup> The DFT functional in conjunction with the 6-311+G(d) basis set, <sup>b)</sup> The DFT functional in conjunction with the def2-TZVPP basis set, <sup>c)</sup> The singlet-point CCSD(T)/aug-cc-pVTZ references values.

**Table S3.** Relative energies (kcal/mol) of  $\Delta E_{2n-1n}$ ,  $\Delta E_{3n-1n}$  and  $\Delta E_{4n-1n}$  and their errors  $\Delta\Delta E_{2n-1n}$ ,  $\Delta\Delta E_{3n-1n}$  and  $\Delta\Delta E_{4n-1n}$  of B<sub>15</sub>. The MAE is in the last column.

|                       | $\Delta E_{2n-1n}$ | $\Delta E_{3n-1n}$ | $\Delta E_{4n-1n}$ | $\Delta\Delta E_{2n-1n}$ | $\Delta\Delta E_{3n-1n}$ | $\Delta\Delta E_{4n-1n}$ | MAE   |
|-----------------------|--------------------|--------------------|--------------------|--------------------------|--------------------------|--------------------------|-------|
| CCSD(T) <sup>c</sup>  | 1.9                | 3.9                | 16.0               | -                        | -                        | -                        | -     |
| B3LYP <sup>a</sup>    | 2.40               | 0.65               | 42.02              | 0.50                     | -3.25                    | 26.02                    | 15.14 |
| B3LYP <sup>b</sup>    | 2.22               | 0.54               | 41.87              | 0.32                     | -3.36                    | 25.87                    | 15.06 |
| M06 <sup>a</sup>      | 3.04               | 3.60               | 3.26               | 1.14                     | -0.30                    | -12.74                   | 7.39  |
| M06 <sup>b</sup>      | 2.09               | 3.50               | 2.11               | 0.19                     | -0.40                    | -13.89                   | 8.03  |
| VSXC <sup>a</sup>     | 2.77               | 1.83               | 26.14              | 0.87                     | -2.07                    | 10.14                    | 6.00  |
| VSXC <sup>b</sup>     | 2.38               | 1.39               | 26.07              | 0.48                     | -2.51                    | 10.07                    | 6.00  |
| B1B95 <sup>a</sup>    | 1.82               | 3.51               | -6.93              | -0.08                    | -0.39                    | -22.93                   | 13.24 |
| B1B95 <sup>b</sup>    | -0.92              | 3.27               | -7.05              | -2.82                    | -0.63                    | -23.05                   | 13.41 |
| BPBE <sup>a</sup>     | 2.73               | 2.85               | 22.30              | 0.83                     | -1.05                    | 6.30                     | 3.72  |
| BPBE <sup>b</sup>     | 2.42               | 2.63               | 21.86              | 0.52                     | -1.27                    | 5.86                     | 3.47  |
| TPSSh <sup>a</sup>    | 1.52               | 1.68               | 10.05              | -0.38                    | -2.22                    | -5.95                    | 3.68  |
| TPSSh <sup>b</sup>    | 1.16               | 1.37               | 9.78               | -0.74                    | -2.53                    | -6.22                    | 3.90  |
| PBE <sup>a</sup>      | 2.94               | 3.49               | 18.45              | 1.04                     | -0.41                    | 2.45                     | 1.56  |
| PBE <sup>b</sup>      | 2.61               | 3.22               | 18.18              | 0.71                     | -0.68                    | 2.18                     | 1.38  |
| PBE0 <sup>a</sup>     | 2.15               | 3.74               | 10.43              | 0.25                     | -0.16                    | -5.57                    | 3.22  |
| PBE0 <sup>b</sup>     | 1.87               | 3.56               | 10.24              | -0.03                    | -0.34                    | -5.76                    | 3.33  |
| HSE06 <sup>a</sup>    | 2.32               | 3.43               | 12.50              | 0.42                     | -0.47                    | -3.50                    | 2.05  |
| HSE06 <sup>b</sup>    | 2.01               | 3.24               | 12.22              | 0.11                     | -0.66                    | -3.78                    | 2.21  |
| B2PLYPD3 <sup>a</sup> | 2.06               | 1.42               | 37.10              | 0.16                     | -2.48                    | 21.10                    | 12.26 |
| B2PLYPD3 <sup>b</sup> | 1.91               | 1.29               | 36.74              | 0.01                     | -2.61                    | 20.74                    | 12.07 |

<sup>a)</sup> The DFT functional in conjunction with the 6-311+G(d) basis set, <sup>b)</sup> The DFT functional in conjunction with the def2-TZVPP basis set, <sup>c)</sup> The singlet-point CCSD(T)/aug-cc-pVTZ references values.

**Table S4.** Relative energies (kcal/mol) of  $\Delta E_{2c-1c}$ ,  $\Delta E_{3c-1c}$  and  $\Delta E_{4c-1c}$  and their errors  $\Delta\Delta E_{2c-1c}$ ,  $\Delta\Delta E_{3c-1c}$  and  $\Delta\Delta E_{4c-1c}$  of  $B_{15}^+$ . The MAE is in the last column.

|                       | $\Delta E_{2c-1c}$ | $\Delta E_{3c-1c}$ | $\Delta E_{4c-1c}$ | $\Delta\Delta E_{2c-1c}$ | $\Delta\Delta E_{3c-1c}$ | $\Delta\Delta E_{4c-1c}$ | MAE   |
|-----------------------|--------------------|--------------------|--------------------|--------------------------|--------------------------|--------------------------|-------|
| CCSD(T) <sup>c</sup>  | 1.9                | 3.9                | 16.0               | -                        | -                        | -                        | -     |
| B3LYP <sup>a</sup>    | 2.40               | 0.65               | 42.02              | 0.50                     | -3.25                    | 26.02                    | 15.14 |
| B3LYP <sup>b</sup>    | 2.22               | 0.54               | 41.87              | 0.32                     | -3.36                    | 25.87                    | 15.06 |
| M06 <sup>a</sup>      | 3.04               | 3.60               | 3.26               | 1.14                     | -0.30                    | -12.74                   | 7.39  |
| M06 <sup>b</sup>      | 2.09               | 3.50               | 2.11               | 0.19                     | -0.40                    | -13.89                   | 8.03  |
| VSXC <sup>a</sup>     | 2.77               | 1.83               | 26.14              | 0.87                     | -2.07                    | 10.14                    | 6.00  |
| VSXC <sup>b</sup>     | 2.38               | 1.39               | 26.07              | 0.48                     | -2.51                    | 10.07                    | 6.00  |
| B1B95 <sup>a</sup>    | 1.82               | 3.51               | -6.93              | -0.08                    | -0.39                    | -22.93                   | 13.24 |
| B1B95 <sup>b</sup>    | -0.92              | 3.27               | -7.05              | -2.82                    | -0.63                    | -23.05                   | 13.41 |
| BPBE <sup>a</sup>     | 2.73               | 2.85               | 22.30              | 0.83                     | -1.05                    | 6.30                     | 3.72  |
| BPBE <sup>b</sup>     | 2.42               | 2.63               | 21.86              | 0.52                     | -1.27                    | 5.86                     | 3.47  |
| TPSSh <sup>a</sup>    | 1.52               | 1.68               | 10.05              | -0.38                    | -2.22                    | -5.95                    | 3.68  |
| TPSSh <sup>b</sup>    | 1.16               | 1.37               | 9.78               | -0.74                    | -2.53                    | -6.22                    | 3.90  |
| PBE <sup>a</sup>      | 2.94               | 3.49               | 18.45              | 1.04                     | -0.41                    | 2.45                     | 1.56  |
| PBE <sup>b</sup>      | 2.61               | 3.22               | 18.18              | 0.71                     | -0.68                    | 2.18                     | 1.38  |
| PBE0 <sup>a</sup>     | 2.15               | 3.74               | 10.43              | 0.25                     | -0.16                    | -5.57                    | 3.22  |
| PBE0 <sup>b</sup>     | 1.87               | 3.56               | 10.24              | -0.03                    | -0.34                    | -5.76                    | 3.33  |
| HSE06 <sup>a</sup>    | 2.32               | 3.43               | 12.50              | 0.42                     | -0.47                    | -3.50                    | 2.05  |
| HSE06 <sup>b</sup>    | 2.01               | 3.24               | 12.22              | 0.11                     | -0.66                    | -3.78                    | 2.21  |
| B2PLYPD3 <sup>a</sup> | 2.06               | 1.42               | 37.10              | 0.16                     | -2.48                    | 21.10                    | 12.26 |
| B2PLYPD3 <sup>b</sup> | 1.91               | 1.29               | 36.74              | 0.01                     | -2.61                    | 20.74                    | 12.07 |

<sup>a)</sup> The DFT functional in conjunction with the 6-311+G(d) basis set, <sup>b)</sup> The DFT functional in conjunction with the def2-TZVPP basis set, <sup>c)</sup> The singlet-point CCSD(T)/aug-cc-pVTZ references values.

## Figures of supplementary information (SI)

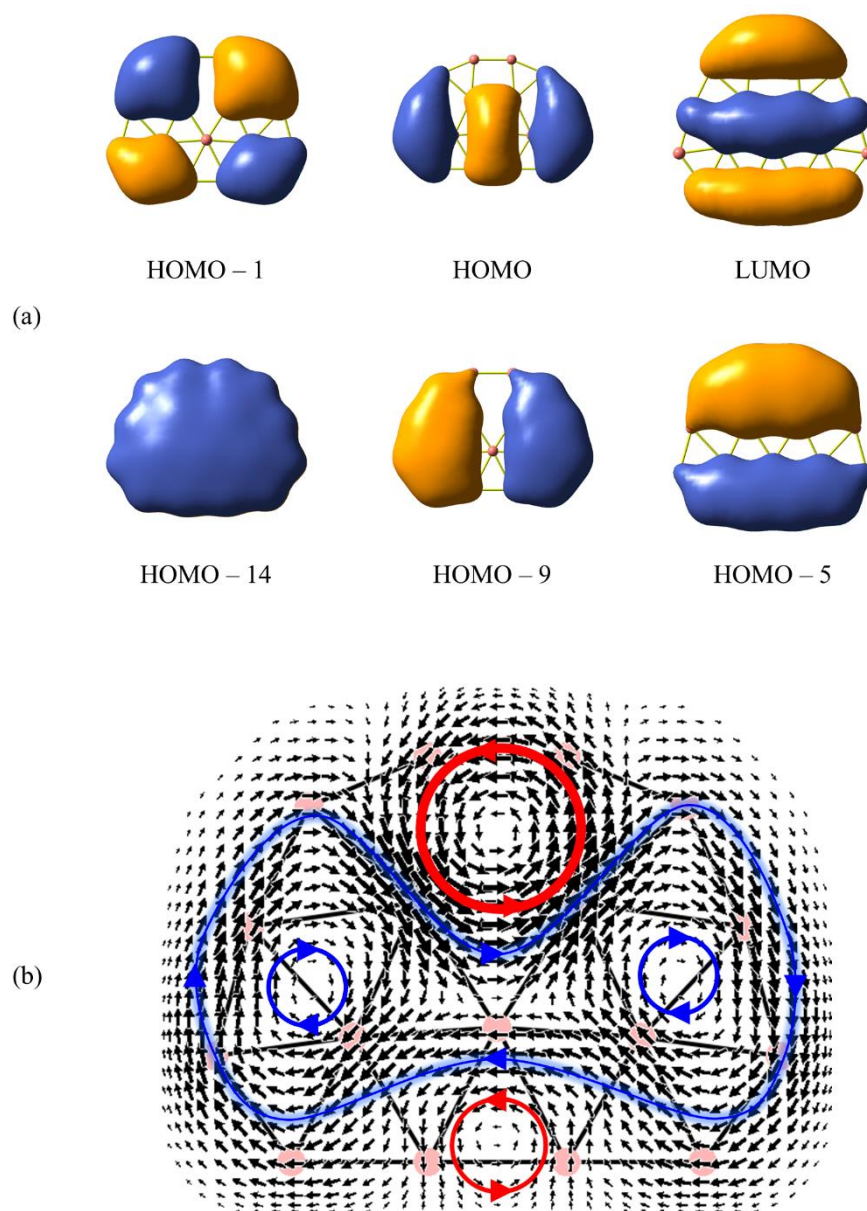

Figure S1. (a) The  $\pi$ -MOs and (b) the  $\pi$  ring current map of  $B_{17}^-$ . Local diatropic and local paramagnetic ring currents are highlighted by blue and red rings, respectively.

## SI: The python code

The python code to compute the dimensions  $L_a \times L_b$  of a rectangle box and the root mean square error (RMSE) (namely rectanglebox.py):

```
import matplotlib.pyplot as plt
import numpy as np
import math
from numpy import random
import scipy.special as sp
import scipy.optimize as opt

def find_La_Lb(C,abE):
    E_RM = (abE[:,0]**2)*C[0] + (abE[:,1]**2)*C[1]
    E_dft = E_RM*C[2] + C[3]
    return np.sum((E_dft - abE[:,2])**2)

plt.rcParams["figure.figsize"] = (5,5)
Edft = np.loadtxt("aC2v.txt", usecols=(0,1,2))
n_occ = 5
n_unocc = 3
xmin = math.floor(100*(np.min(Edft[:, 2]) - 0.02))/100
xmax = math.ceil(100*(np.max(Edft[:, 2]) + 0.02))/100
x = np.linspace(xmin, xmax, 11)
y = x
plt.plot(x, y,'k--')
plt.axis('equal')

c_guess = np.ones(4)
c_guess[3] = -1

Eocc = Edft[:n_occ, :]
Eunocc = Edft[-n_unocc:, :]
Cminimo = opt.minimize(find_La_Lb,c_guess,args=(Eocc))
c_out = Cminimo.x
La = 0.529177249*np.pi/np.sqrt(2*c_out[0]*c_out[2])
Lb = 0.529177249*np.pi/np.sqrt(2*c_out[1]*c_out[2])
E_1 = (Eocc[:,0]**2)*c_out[0] + (Eocc[:,1]**2)*c_out[1]
E_r_occ = E_1*c_out[2] + c_out[3]
RMSE = np.sqrt(np.sum((E_r_occ - Eocc[:,2])**2)/n_occ)
E_2 = (Eunocc[:,0]**2)*c_out[0] + (Eunocc[:,1]**2)*c_out[1]
E_r_unocc = E_2*c_out[2] + c_out[3]
plt.plot(E_r_occ, Eocc[:,2], 'ro',markersize=12,fillstyle='none')
plt.plot(E_r_unocc, Eunocc[:,2], 'bs',markersize=12,fillstyle='none')
print(f"Rectangle box:")
print(f"    La = {La:.4f} Angstrom")
print(f"    Lb = {Lb:.4f} Angstrom")
print(f"    La/Lb = {La/Lb:.4f} ")
print(f"    RMSE = {RMSE:.4f} ")
print(f"    ")
```

```
plt.savefig('rectangle.png', dpi=300)
```

will read the MO information of **1a-C<sub>2v</sub>** in the file “aC2v.txt”:

|   |   |              |
|---|---|--------------|
| 1 | 1 | -0.212942157 |
| 2 | 1 | -0.147224498 |
| 1 | 2 | -0.127987704 |
| 3 | 1 | -0.076135935 |
| 2 | 2 | -0.034904343 |
| 1 | 3 | -0.014415061 |
| 4 | 1 | 0.045922111  |
| 3 | 2 | 0.046338683  |

content with three columns representing the quantum numbers *a*, *b*, and MO energy (Hartree), respectively.

### Additional information on isomers

Cartesian coordinates (in angstrom), energies (E, Hartree), and zero-point energies (ZPE, Hartree) of lower-lying isomers optimized at the PBE/6-311+G(d) level.

#### **1a**

E = -372.115403224, ZPE = 0.05783

|   |              |              |              |
|---|--------------|--------------|--------------|
| 5 | -0.029089000 | 1.145113000  | 2.018757000  |
| 5 | -0.101002000 | -0.124567000 | 0.844625000  |
| 5 | -0.101002000 | -0.124567000 | -0.844625000 |
| 5 | 0.052006000  | -0.356989000 | 2.481697000  |
| 5 | -0.302907000 | -1.639556000 | 0.000000000  |
| 5 | 0.169519000  | 1.501723000  | 0.000000000  |
| 5 | -0.046903000 | 2.587783000  | 1.387771000  |
| 5 | -0.029089000 | 1.145113000  | -2.018757000 |
| 5 | 0.111916000  | 3.223220000  | 0.000000000  |
| 5 | -0.046903000 | 2.587783000  | -1.387771000 |
| 5 | 0.012482000  | -1.765314000 | 1.748570000  |
| 5 | 0.052006000  | -0.356989000 | -2.481697000 |
| 5 | 0.123241000  | -3.028720000 | -0.777840000 |
| 5 | 0.123241000  | -3.028720000 | 0.777840000  |
| 5 | 0.012482000  | -1.765314000 | -1.748570000 |

#### **1a-C<sub>2v</sub>**

E = -372.104077266; Number of imaginary frequencies = 2

|   |              |              |              |
|---|--------------|--------------|--------------|
| 5 | 0.000000000  | 1.987156000  | 1.157686000  |
| 5 | 0.000000000  | 0.831981000  | -0.115526000 |
| 5 | 0.000000000  | -0.831981000 | -0.115526000 |
| 5 | 0.000000000  | 2.461528000  | -0.367077000 |
| 5 | 0.000000000  | 0.000000000  | -1.612398000 |
| 5 | 0.000000000  | 0.000000000  | 1.491774000  |
| 5 | 0.000000000  | 1.398267000  | 2.600467000  |
| 5 | 0.000000000  | -1.987156000 | 1.157686000  |
| 5 | 0.000000000  | 0.000000000  | 3.234548000  |
| 5 | 0.000000000  | -1.398267000 | 2.600467000  |
| 5 | 0.000000000  | 1.777568000  | -1.790919000 |
| 5 | 0.000000000  | -2.461528000 | -0.367077000 |
| 5 | 0.000000000  | -0.779837000 | -3.041593000 |
| 5 | -0.000000000 | 0.779837000  | -3.041593000 |
| 5 | 0.000000000  | -1.777568000 | -1.790919000 |



**2a**

E = -372.1150576, ZPE = 0.060007

|   |              |              |              |
|---|--------------|--------------|--------------|
| 5 | -0.905151000 | 1.484710000  | 0.085927000  |
| 5 | -2.521820000 | 1.337327000  | 0.283473000  |
| 5 | 0.420672000  | 2.374192000  | -0.363829000 |
| 5 | -3.414754000 | 0.092577000  | -0.054838000 |
| 5 | -0.210561000 | -0.369298000 | 0.216782000  |
| 5 | -2.788013000 | -1.348954000 | -0.003908000 |
| 5 | 1.940809000  | 2.059005000  | -0.211776000 |
| 5 | -1.212331000 | -1.707871000 | -0.048346000 |
| 5 | -1.768234000 | -0.048161000 | -0.320804000 |
| 5 | 2.706952000  | 0.679755000  | 0.053403000  |
| 5 | 0.831446000  | 0.982935000  | 0.398174000  |
| 5 | 3.044811000  | -0.894104000 | 0.040617000  |
| 5 | 2.037124000  | -2.083896000 | -0.097765000 |
| 5 | 1.434431000  | -0.593688000 | 0.164052000  |
| 5 | 0.404620000  | -1.964529000 | -0.141162000 |

**3a**

E = -372.1112236; ZPE = 0.057794

|   |             |              |              |
|---|-------------|--------------|--------------|
| 5 | 0.000000000 | 1.496216000  | 0.809929000  |
| 5 | 0.000000000 | 0.775607000  | 3.503188000  |
| 5 | 0.000000000 | 0.000000000  | 1.865603000  |
| 5 | 0.000000000 | 1.496216000  | -0.809929000 |
| 5 | 0.000000000 | 0.000000000  | 0.000000000  |
| 5 | 0.000000000 | 0.000000000  | -1.865603000 |
| 5 | 0.000000000 | -1.496216000 | -0.809929000 |
| 5 | 0.000000000 | 0.775607000  | -3.503188000 |
| 5 | 0.000000000 | -1.747941000 | -2.323776000 |
| 5 | 0.000000000 | -0.775607000 | -3.503188000 |
| 5 | 0.000000000 | 1.747941000  | -2.323776000 |
| 5 | 0.000000000 | 1.747941000  | 2.323776000  |
| 5 | 0.000000000 | -1.747941000 | 2.323776000  |
| 5 | 0.000000000 | -1.496216000 | 0.809929000  |
| 5 | 0.000000000 | -0.775607000 | 3.503188000  |

**4a**

E = -372.1003049; ZPE = 0.058385

|   |              |              |              |
|---|--------------|--------------|--------------|
| 5 | 0.846014000  | -1.878289000 | 0.246587000  |
| 5 | -0.765450000 | -1.919832000 | -0.165139000 |
| 5 | 2.404071000  | -1.579971000 | -0.197393000 |
| 5 | -2.877405000 | -0.117223000 | -0.679180000 |
| 5 | -0.006934000 | -0.552544000 | 0.978314000  |
| 5 | -2.194824000 | 1.147776000  | 0.070816000  |
| 5 | -0.977225000 | 0.848647000  | 1.160449000  |
| 5 | -0.683477000 | 1.916180000  | -0.215047000 |
| 5 | -1.522815000 | -0.429151000 | 0.208715000  |
| 5 | 2.916554000  | -0.154518000 | -0.511854000 |
| 5 | 1.572260000  | -0.317377000 | 0.413381000  |
| 5 | 2.055070000  | 1.254064000  | -0.476570000 |
| 5 | -2.200836000 | -1.555384000 | -0.758700000 |
| 5 | 0.836960000  | 2.237915000  | -0.630622000 |
| 5 | 0.598037000  | 1.099708000  | 0.556244000  |

**7a**

E = -372.1094639; ZPE = 0.057329

|   |              |              |             |
|---|--------------|--------------|-------------|
| 5 | 1.437965000  | 1.818120000  | 0.000000000 |
| 5 | 0.000000000  | 0.856403000  | 0.000000000 |
| 5 | -0.178027000 | -0.854047000 | 0.000000000 |
| 5 | 0.010183000  | 2.525251000  | 0.000000000 |
| 5 | -1.589264000 | 0.191612000  | 0.000000000 |
| 5 | 1.535687000  | -0.031232000 | 0.000000000 |
| 5 | 2.847994000  | 1.072090000  | 0.000000000 |
| 5 | 0.800083000  | -2.311850000 | 0.000000000 |
| 5 | 3.164948000  | -0.443276000 | 0.000000000 |
| 5 | 2.263997000  | -1.691376000 | 0.000000000 |
| 5 | -1.483061000 | 1.959544000  | 0.000000000 |
| 5 | -0.739165000 | -2.435986000 | 0.000000000 |
| 5 | -3.136340000 | -0.347316000 | 0.000000000 |
| 5 | -2.894275000 | 1.195502000  | 0.000000000 |
| 5 | -2.040723000 | -1.503439000 | 0.000000000 |

**1n**

E = -371.9983039; ZPE = 0.057496

|   |              |              |              |
|---|--------------|--------------|--------------|
| 5 | 0.087491000  | -0.111842000 | 0.834027000  |
| 5 | 0.087491000  | -0.111842000 | -0.834027000 |
| 5 | 0.159348000  | -1.613954000 | 0.000000000  |
| 5 | -0.045039000 | -0.360303000 | 2.473948000  |
| 5 | -0.063580000 | 3.230969000  | 0.000000000  |
| 5 | -0.019394000 | -1.781906000 | -1.768842000 |
| 5 | 0.016741000  | 2.604263000  | 1.392239000  |
| 5 | -0.061622000 | -3.042801000 | -0.772206000 |
| 5 | -0.045039000 | -0.360303000 | -2.473948000 |
| 5 | 0.006086000  | 1.141441000  | -2.002951000 |
| 5 | 0.006086000  | 1.141441000  | 2.002951000  |
| 5 | -0.019394000 | -1.781906000 | 1.768842000  |
| 5 | -0.061622000 | -3.042801000 | 0.772206000  |
| 5 | -0.064296000 | 1.485281000  | 0.000000000  |
| 5 | 0.016741000  | 2.604263000  | -1.392239000 |

**2n**

E = -371.9944239; ZPE = 0.057778

|   |              |              |              |
|---|--------------|--------------|--------------|
| 5 | 1.708828000  | -0.146988000 | 2.371212000  |
| 5 | 1.708828000  | -0.146988000 | -2.371212000 |
| 5 | 1.957679000  | -0.079749000 | 0.815514000  |
| 5 | 1.957679000  | -0.079749000 | -0.815514000 |
| 5 | 0.140722000  | 0.073371000  | 1.524789000  |
| 5 | -1.051260000 | -0.071887000 | 2.812425000  |
| 5 | -1.851812000 | -0.082413000 | -1.457325000 |
| 5 | -1.851812000 | -0.082413000 | 1.457325000  |
| 5 | 0.421464000  | -0.130394000 | 3.228233000  |
| 5 | -2.434115000 | -0.173922000 | 0.000000000  |
| 5 | 0.421464000  | -0.130394000 | -3.228233000 |
| 5 | 0.140722000  | 0.073371000  | -1.524789000 |
| 5 | -0.906516000 | 0.438462000  | 0.000000000  |
| 5 | 0.689387000  | 0.611581000  | 0.000000000  |
| 5 | -1.051260000 | -0.071887000 | -2.812425000 |

**3n**

E = -371.9932837; ZPE = 0.057609

|   |             |              |              |
|---|-------------|--------------|--------------|
| 5 | 0.000000000 | 1.499362000  | 0.800986000  |
| 5 | 0.000000000 | 0.769733000  | 3.512854000  |
| 5 | 0.000000000 | 0.000000000  | 1.852530000  |
| 5 | 0.000000000 | 1.499362000  | -0.800986000 |
| 5 | 0.000000000 | 0.000000000  | 0.000000000  |
| 5 | 0.000000000 | 0.000000000  | -1.852530000 |
| 5 | 0.000000000 | -1.499362000 | -0.800986000 |
| 5 | 0.000000000 | 0.769733000  | -3.512854000 |
| 5 | 0.000000000 | -1.746338000 | -2.326075000 |
| 5 | 0.000000000 | -0.769733000 | -3.512854000 |
| 5 | 0.000000000 | 1.746338000  | -2.326075000 |
| 5 | 0.000000000 | 1.746338000  | 2.326075000  |
| 5 | 0.000000000 | -1.746338000 | 2.326075000  |
| 5 | 0.000000000 | -1.499362000 | 0.800986000  |
| 5 | 0.000000000 | -0.769733000 | 3.512854000  |

**4n**

E = -371.9697324; ZPE = 0.057893

|   |              |              |              |
|---|--------------|--------------|--------------|
| 5 | 0.000000000  | 2.740992000  | -0.760910000 |
| 5 | 0.000000000  | 0.000000000  | 0.982202000  |
| 5 | -1.364664000 | 2.114714000  | -0.345955000 |
| 5 | -1.540502000 | -0.833879000 | 0.525114000  |
| 5 | 0.000000000  | 0.874746000  | -0.861337000 |
| 5 | 1.364664000  | -2.114714000 | -0.345955000 |
| 5 | 0.000000000  | -2.740992000 | -0.760910000 |
| 5 | 0.000000000  | 1.681438000  | 0.772830000  |
| 5 | 1.540502000  | -0.833879000 | 0.525114000  |
| 5 | -1.540502000 | 0.833879000  | 0.525114000  |
| 5 | 1.364664000  | 2.114714000  | -0.345955000 |
| 5 | 1.540502000  | 0.833879000  | 0.525114000  |
| 5 | 0.000000000  | -0.874746000 | -0.861337000 |
| 5 | 0.000000000  | -1.681438000 | 0.772830000  |
| 5 | -1.364664000 | -2.114714000 | -0.345955000 |

**1c**

E = -371.7264283; ZPE = 0.057656

|   |            |             |             |
|---|------------|-------------|-------------|
| 5 | 0.00000000 | 2.01192000  | 1.13340200  |
| 5 | 0.00000000 | 0.82840800  | -0.09959000 |
| 5 | 0.00000000 | -0.82840800 | -0.09959000 |
| 5 | 0.00000000 | 2.48309900  | -0.36252000 |
| 5 | 0.00000000 | 0.00000000  | -1.60163400 |
| 5 | 0.00000000 | 0.00000000  | 1.48067700  |
| 5 | 0.00000000 | 1.39233600  | 2.62069800  |
| 5 | 0.00000000 | -2.01192000 | 1.13340200  |
| 5 | 0.00000000 | 0.00000000  | 3.24588100  |
| 5 | 0.00000000 | -1.39233600 | 2.62069800  |
| 5 | 0.00000000 | 1.78520400  | -1.79682900 |
| 5 | 0.00000000 | -2.48309900 | -0.36252000 |
| 5 | 0.00000000 | -0.76862100 | -3.05762300 |
| 5 | 0.00000000 | 0.76862100  | -3.05762300 |
| 5 | 0.00000000 | -1.78520400 | -1.79682900 |

**2c**

E = -371.722467; ZPE = 0.057787

|   |             |             |             |
|---|-------------|-------------|-------------|
| 5 | -1.70154900 | -0.17914900 | 2.37787500  |
| 5 | -0.13170600 | 0.14585600  | 1.52577300  |
| 5 | 0.90031700  | 0.43647900  | 0.00000000  |
| 5 | 2.45453100  | -0.13326700 | 0.00000000  |
| 5 | -0.69747100 | 0.62399400  | 0.00000000  |
| 5 | -1.96901800 | -0.09019200 | -0.80356200 |
| 5 | -0.42140100 | -0.11159000 | 3.24343300  |
| 5 | 1.85212600  | -0.10779400 | 1.44536700  |
| 5 | -0.13170600 | 0.14585600  | -1.52577300 |
| 5 | 1.04286000  | -0.12073300 | 2.82349800  |
| 5 | -1.96901800 | -0.09019200 | 0.80356200  |
| 5 | 1.85212600  | -0.10779400 | -1.44536700 |
| 5 | -0.42140100 | -0.11159000 | -3.24343300 |
| 5 | -1.70154900 | -0.17914900 | -2.37787500 |
| 5 | 1.04286000  | -0.12073300 | -2.82349800 |

**3c**

E = -371.7149238; ZPE = 0.057062

|   |            |             |             |
|---|------------|-------------|-------------|
| 5 | 0.00000000 | 1.50488300  | 0.79465900  |
| 5 | 0.00000000 | 0.76664200  | 3.53425700  |
| 5 | 0.00000000 | 0.00000000  | 1.84247600  |
| 5 | 0.00000000 | 1.50488300  | -0.79465900 |
| 5 | 0.00000000 | 0.00000000  | 0.00000000  |
| 5 | 0.00000000 | 0.00000000  | -1.84247600 |
| 5 | 0.00000000 | -1.50488300 | -0.79465900 |
| 5 | 0.00000000 | 0.76664200  | -3.53425700 |
| 5 | 0.00000000 | -1.74741800 | -2.33572100 |
| 5 | 0.00000000 | -0.76664200 | -3.53425700 |
| 5 | 0.00000000 | 1.74741800  | -2.33572100 |
| 5 | 0.00000000 | 1.74741800  | 2.33572100  |
| 5 | 0.00000000 | -1.74741800 | 2.33572100  |
| 5 | 0.00000000 | -1.50488300 | 0.79465900  |
| 5 | 0.00000000 | -0.76664200 | 3.53425700  |

**4c**

E = -371.7171278; ZPE = 0.058825

|   |             |             |             |
|---|-------------|-------------|-------------|
| 5 | 0.00000000  | 2.03584100  | 0.00000000  |
| 5 | 1.60194900  | 1.82288200  | 0.00000000  |
| 5 | -1.60194900 | 1.82288200  | 0.00000000  |
| 5 | 0.00000000  | -0.99386300 | 0.90784700  |
| 5 | 0.86071100  | 0.49693200  | -0.90784700 |
| 5 | 2.37963600  | 0.47588800  | 0.00000000  |
| 5 | 1.76309000  | -1.01792000 | 0.00000000  |
| 5 | -0.86071100 | 0.49693200  | 0.90784700  |
| 5 | 0.86071100  | 0.49693200  | 0.90784700  |
| 5 | -2.37963600 | 0.47588800  | 0.00000000  |
| 5 | -0.86071100 | 0.49693200  | -0.90784700 |
| 5 | -1.76309000 | -1.01792000 | 0.00000000  |
| 5 | -0.77768700 | -2.29876900 | 0.00000000  |
| 5 | 0.00000000  | -0.99386300 | -0.90784700 |
| 5 | 0.77768700  | -2.29876900 | 0.00000000  |
